# Supplementary material for: Estimating degree-day factors of snow based on energy flux components
Source: Copernicus journal article supplement (doi:10.5194/tc-17-211-2023), 2023-01-17
Supplement: Supplementary file 1 [file tc-17-211-2023-supplement.pdf]

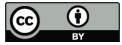

*Supplement of*

## **Estimating degree-day factors of snow based on energy flux components**

**Muhammad Fraz Ismail et al.**

*Correspondence to:* Muhammad Fraz Ismail (fraz.ismail@tum.de, ismail@hs-koblenz.de)

The copyright of individual parts of the supplement might differ from the article licence.

## Supplementary materials to section 4

### S.1 Tables for DDF components (i.e., DDF<sub>L</sub>, DDF<sub>H</sub>, DDF<sub>E</sub>)

**Table S1** Longwave radiation component (DDF<sub>L</sub>) (mm °C<sup>-1</sup> d<sup>-1</sup>) for selected cloudiness (%) and degree-days (°C d)

| $T_{DD}$ (°C d) | DDF <sub>L</sub> |        |        |        |        |       |       |       |       |       |      |
|-----------------|------------------|--------|--------|--------|--------|-------|-------|-------|-------|-------|------|
|                 | Cloudiness       |        |        |        |        |       |       |       |       |       |      |
|                 | 0%               | 10%    | 20%    | 30%    | 40%    | 50%   | 60%   | 70%   | 80%   | 90%   | 100% |
| 1               | -19.08           | -17.17 | -15.26 | -13.35 | -11.45 | -9.54 | -7.63 | -5.72 | -3.81 | -1.90 | 0.01 |
| 2               | -8.89            | -7.94  | -6.99  | -6.04  | -5.09  | -4.14 | -3.19 | -2.24 | -1.29 | -0.33 | 0.62 |
| 3               | -5.49            | -4.86  | -4.23  | -3.59  | -2.96  | -2.33 | -1.70 | -1.07 | -0.44 | 0.19  | 0.82 |
| 4               | -3.78            | -3.31  | -2.84  | -2.37  | -1.90  | -1.42 | -0.95 | -0.48 | -0.01 | 0.46  | 0.93 |
| 5               | -2.75            | -2.38  | -2.00  | -1.63  | -1.25  | -0.88 | -0.50 | -0.13 | 0.25  | 0.62  | 1.00 |
| 6               | -2.06            | -1.75  | -1.44  | -1.13  | -0.82  | -0.51 | -0.20 | 0.11  | 0.43  | 0.74  | 1.05 |
| 7               | -1.57            | -1.30  | -1.04  | -0.77  | -0.51  | -0.24 | 0.02  | 0.29  | 0.55  | 0.82  | 1.08 |
| 8               | -1.19            | -0.96  | -0.73  | -0.50  | -0.27  | -0.04 | 0.19  | 0.42  | 0.65  | 0.88  | 1.11 |
| 9               | -0.90            | -0.69  | -0.49  | -0.29  | -0.08  | 0.12  | 0.32  | 0.53  | 0.73  | 0.93  | 1.14 |
| 10              | -0.66            | -0.48  | -0.30  | -0.11  | 0.07   | 0.25  | 0.43  | 0.61  | 0.79  | 0.98  | 1.16 |
| 15              | 0.08             | 0.19   | 0.31   | 0.43   | 0.54   | 0.66  | 0.77  | 0.89  | 1.01  | 1.12  | 1.24 |
| 20              | 0.48             | 0.56   | 0.64   | 0.72   | 0.81   | 0.89  | 0.97  | 1.05  | 1.13  | 1.21  | 1.30 |

**Table S2** Sensible heat component (DDF<sub>H</sub>) (mm °C<sup>-1</sup> d<sup>-1</sup>) for selected altitude (m a.s.l.) and degree-days (°C d),  $RH=0\%$ ,  $u=1.0\text{ m s}^{-1}$

| $T_{DD}$ (°C d) | DDF <sub>H</sub>     |       |       |       |       |       |
|-----------------|----------------------|-------|-------|-------|-------|-------|
|                 | Altitudes (m a.s.l.) |       |       |       |       |       |
|                 | 0                    | 1000  | 2000  | 3000  | 4000  | 5000  |
| 1               | 0.806                | 0.712 | 0.628 | 0.555 | 0.490 | 0.432 |
| 5               | 0.795                | 0.703 | 0.621 | 0.550 | 0.486 | 0.430 |
| 10              | 0.781                | 0.692 | 0.613 | 0.543 | 0.482 | 0.427 |
| 15              | 0.767                | 0.681 | 0.605 | 0.537 | 0.477 | 0.424 |
| 20              | 0.754                | 0.671 | 0.597 | 0.531 | 0.473 | 0.421 |

*Note: DDF<sub>H</sub> for any other windspeed can be obtained by just multiplying with the desired windspeed value.*

**Table S3** Latent heat component ( $DDF_E$ ) ( $\text{mm } ^\circ\text{C}^{-1} \text{d}^{-1}$ ) for selected relative humidity (%), degree-days ( $^\circ\text{C d}$ ) and wind speed  $u = 1$  ( $\text{m s}^{-1}$ ).  $DDF_E$  values are for  $u=1 \text{ m s}^{-1}$ , for a different wind speed these  $DDF_E$  values can be multiplied for desired wind speed. Air density values are assumed at an elevation of 0 m a.s.l.

| $T_{DD}$ ( $^\circ\text{C d}$ ) | $DDF_E$           |       |       |       |       |       |       |       |       |      |
|---------------------------------|-------------------|-------|-------|-------|-------|-------|-------|-------|-------|------|
|                                 | Relative Humidity |       |       |       |       |       |       |       |       |      |
|                                 | 10%               | 20%   | 30%   | 40%   | 50%   | 60%   | 70%   | 80%   | 90%   | 100% |
| 1                               | -6.91             | -6.19 | -5.42 | -4.62 | -3.79 | -2.94 | -2.07 | -1.18 | -0.28 | 0.57 |
| 2                               | -3.42             | -3.03 | -2.61 | -2.18 | -1.73 | -1.27 | -0.80 | -0.32 | 0.15  | 0.58 |
| 3                               | -2.25             | -1.97 | -1.67 | -1.36 | -1.04 | -0.71 | -0.37 | -0.02 | 0.29  | 0.60 |
| 4                               | -1.67             | -1.44 | -1.20 | -0.95 | -0.69 | -0.42 | -0.14 | 0.12  | 0.37  | 0.62 |
| 5                               | -1.32             | -1.12 | -0.91 | -0.70 | -0.47 | -0.24 | 0.00  | 0.21  | 0.42  | 0.64 |
| 6                               | -1.08             | -0.91 | -0.72 | -0.52 | -0.32 | -0.11 | 0.09  | 0.28  | 0.47  | 0.65 |
| 7                               | -0.91             | -0.75 | -0.58 | -0.40 | -0.21 | -0.02 | 0.16  | 0.33  | 0.50  | 0.67 |
| 8                               | -0.79             | -0.63 | -0.47 | -0.30 | -0.13 | 0.05  | 0.21  | 0.37  | 0.53  | 0.69 |
| 9                               | -0.69             | -0.54 | -0.39 | -0.22 | -0.06 | 0.10  | 0.26  | 0.41  | 0.56  | 0.72 |
| 10                              | -0.61             | -0.47 | -0.32 | -0.16 | 0.00  | 0.15  | 0.30  | 0.44  | 0.59  | 0.74 |
| 15                              | -0.36             | -0.23 | -0.09 | 0.06  | 0.19  | 0.32  | 0.46  | 0.59  | 0.72  | 0.86 |
| 20                              | -0.23             | -0.09 | 0.05  | 0.19  | 0.32  | 0.46  | 0.59  | 0.73  | 0.86  | 1.00 |

## Supplementary materials to section 5

### S.2 Comparison of Snow Temperature Calculation by Walter and SNOWPACK

The approach by Walter et al., (2005) uses daily energy balance and a daily time-step for snow-water equivalent simulation. Snow temperature is a lumped variable representing the cold content of the snowpack. An incoming daily net energy flux is first used to raise the (isothermal) snowpack temperature to 0°C, all additional available energy produces melt. An outgoing daily net energy flux lowers the snow temperature.

The SNOWPACK model (Bartelt and Lehning, 2002; Lehning et al., 2002) simulates the physical processes inside a snowpack in detail by a finite element approach. Meteorological forcing data should best be given at an hourly time-step, calculation time-step is usually 15 min with adaptive smaller time-steps if required for numerical stability. Snow temperature is a variable at each node, usually each 2 cm, of the snow profile. For comparison, the snow temperature is averaged over the snowpack profile and aggregated to daily values.

Hourly observed meteorological data from Brunnenkopfhütte test site i.e. air temperature, incoming short wave radiation, albedo, wind speed, relative humidity, and precipitation was used as input for SNOWPACK. For Walter's approach, these hourly values were aggregated to daily input.

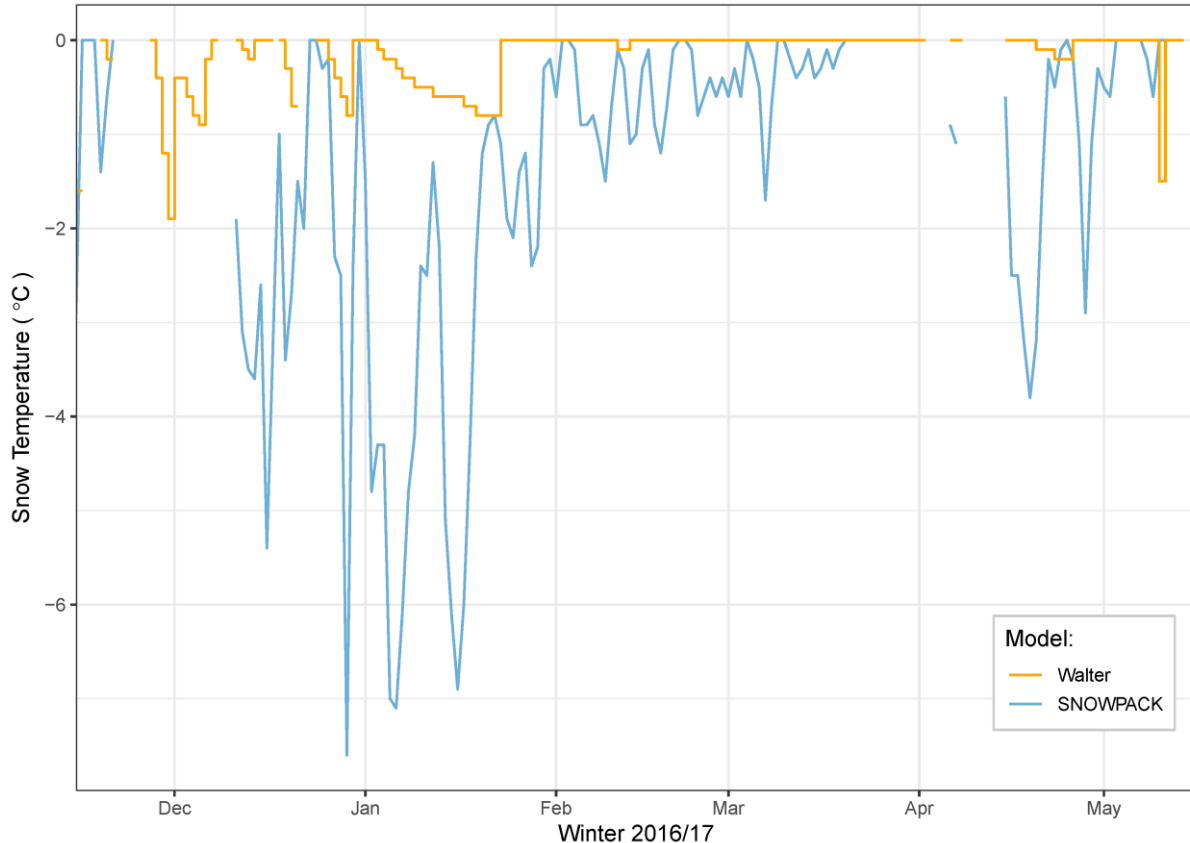

**Figure S1** Comparison of Simulated Snow Temperature Winter 2016/2017

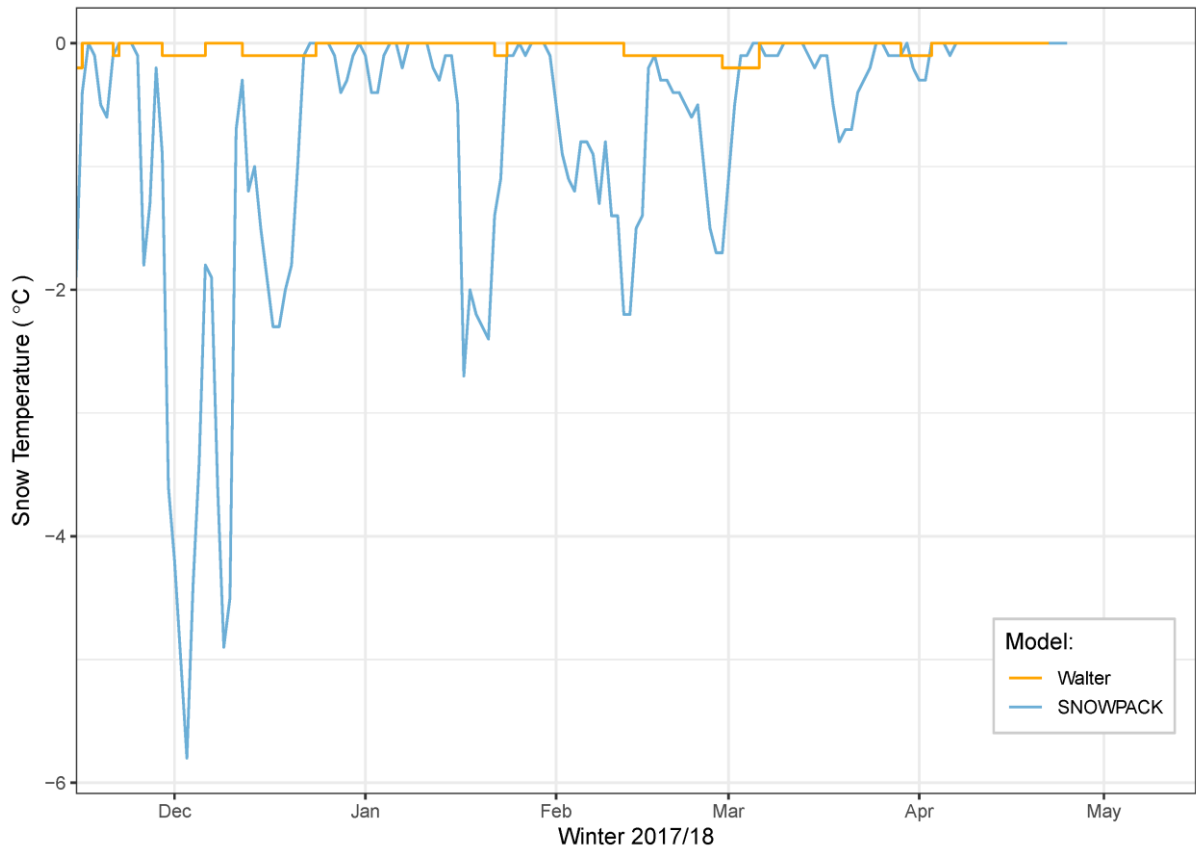

**Figure S2** Comparison of Simulated Snow Temperature Winter 2017/2018

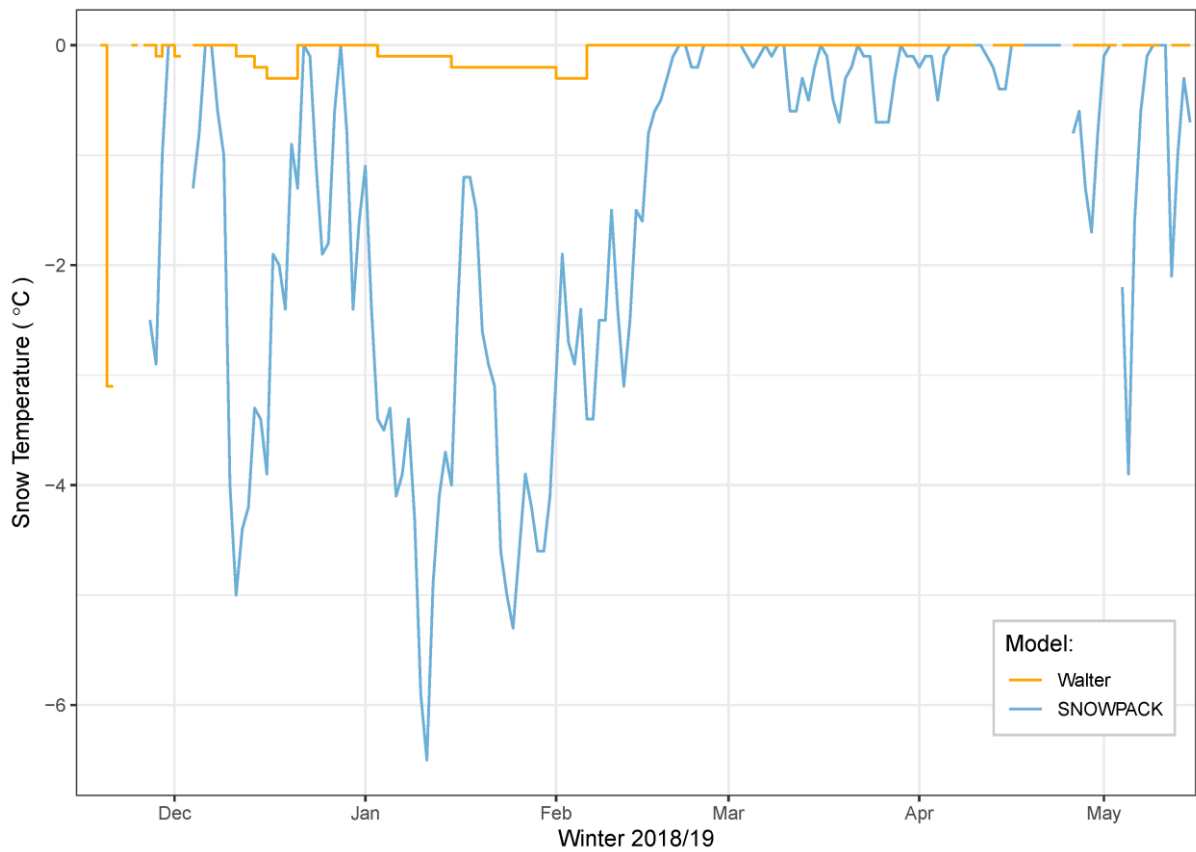

**Figure S3** Comparison of Simulated Snow Temperature Winter 2018/2019

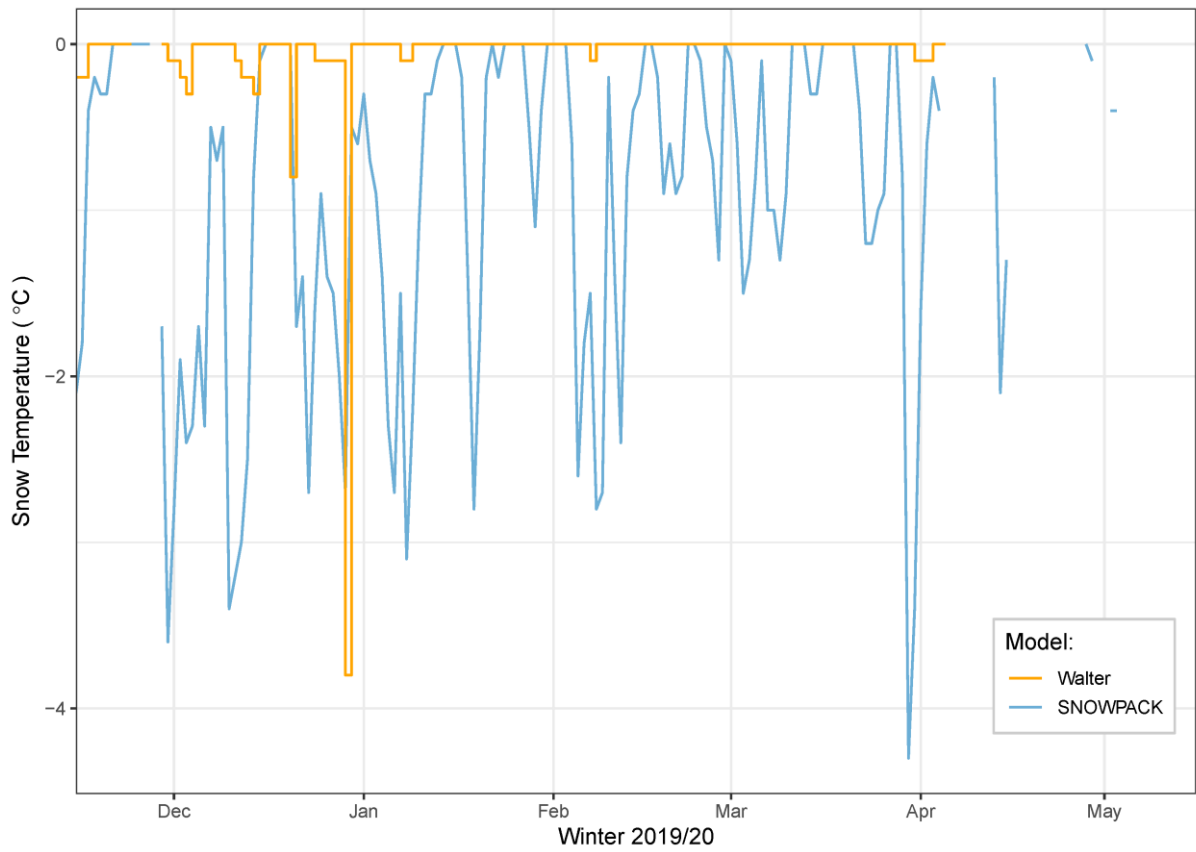

**Figure S4** Comparison of Simulated Snow Temperature Winter 2019/2020

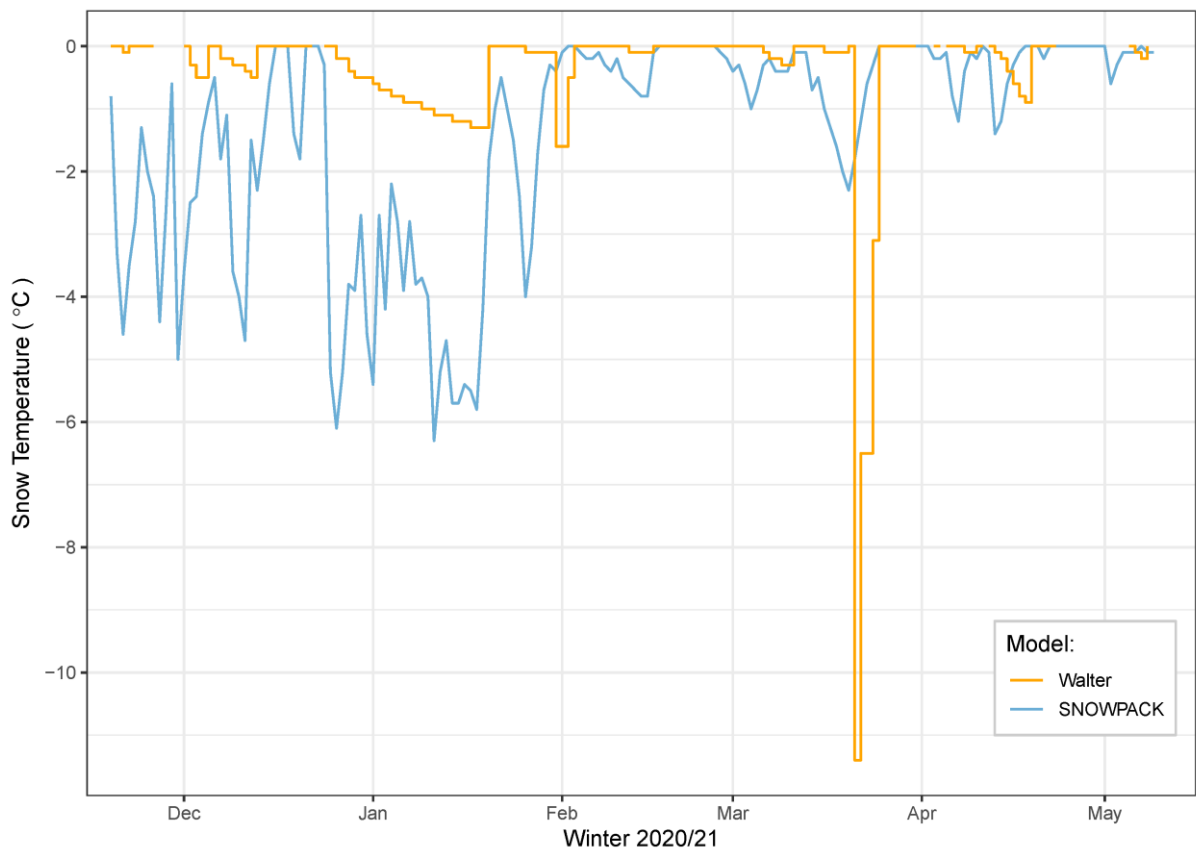

**Figure S5** Comparison of Simulated Snow Temperature Winter 2020/2021

## References

Bartelt, P., Lehning, M.: A physical SNOWPACK model for the Swiss avalanche warning. Part I: numerical model. *Cold Regions Science and Technology*, 35, 123–145, [https://doi.org/10.1016/S0165-232X\(02\)00074-5](https://doi.org/10.1016/S0165-232X(02)00074-5), 2002.

Lehning, M., Bartelt, P., Brown, B., and Fierz, C.: A physical SNOWPACK model for the Swiss avalanche warning. Part III: meteorological forcing, thin layer formation and evaluation. *Cold Regions Science and Technology*, 35, 169–184, [https://doi.org/10.1016/S0165-232X\(02\)00072-1](https://doi.org/10.1016/S0165-232X(02)00072-1), 2002.

Walter, M. T., Brooks, E. S., McCool, D. K., King, L. G., Molnau, M., and Boll, J.: Process-based snowmelt modeling: does it require more input data than temperature-index modeling, *Journal of hydrology*, v. 300, 65–75, 2005.
